# Supplementary material for: Bioinspired Cell-Derived Nanovesicles versus Exosomes as Drug Delivery Systems: a Cost-Effective Alternative
Source: PubMed Central journal article supplement (PMC5662560; doi:10.1038/s41598-017-14725-x), 2017-10-30
Supplement: 41598_2017_14725_MOESM1_ESM.pdf [file 41598_2017_14725_MOESM1_ESM.pdf]

**Bioinspired Cell-Derived Nanovesicles *versus* Exosomes as Drug Delivery Systems: a Cost-Effective Alternative**

By Wei Jiang Goh, Zou Shui, Wei Yi Ong, Federico Torta, Alvarez Fernandez Alexandra, Raymond M. Schiffelers, Gert Storm, Jiong-Wei Wang, Bertrand Czarny\* and Giorgia Pastorin\*

**Supplementary Information**

**A Effect of Temperature on Nanovesicles Size in PBS**

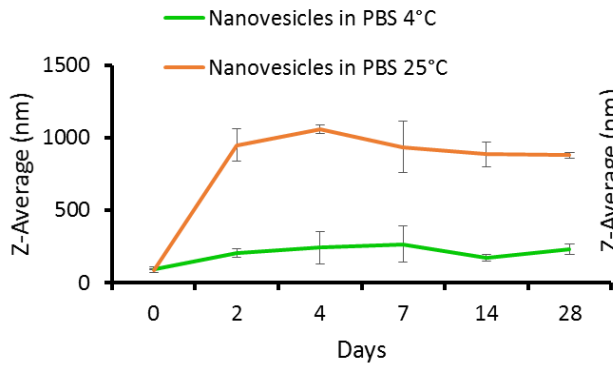

**B Investigation of Charge Screening Effect in PBS and 0.9% NaCl**

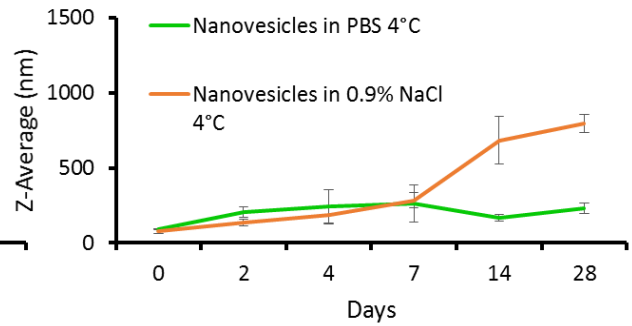

**Figure S1.** CDNs stability studies measuring increasing in size and aggregation of CDNs over 4 weeks relating to (a) Temperature and (b) different buffer systems using PBS and Normal Saline at 4°C.

**A Free Cy<sub>5.5</sub> dye**

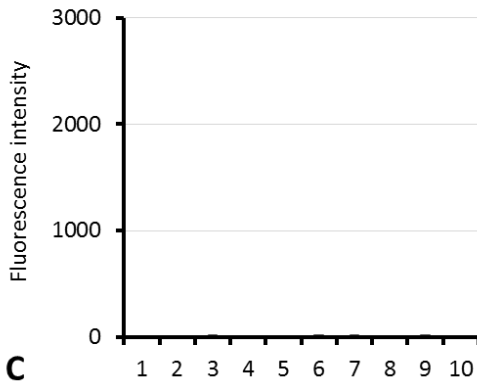

**B CDNCy<sub>5.5</sub>**

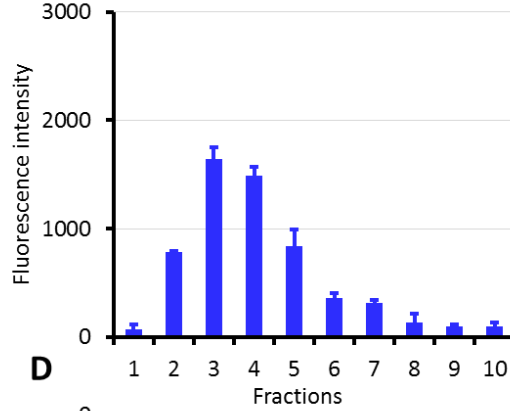

**C Free Cy<sub>5.5</sub> dye**

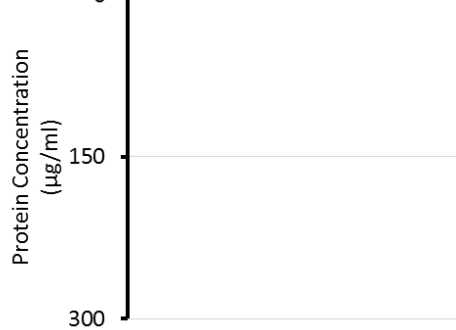

**D CDNCy<sub>5.5</sub>**

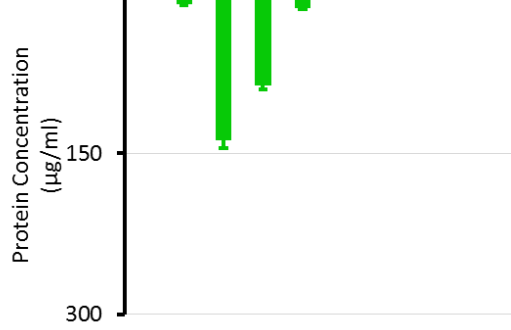

**Figure S2.** Fractions collected from Size Exclusion Chromatography were assayed for fluorescence intensity of the Cyanine 5.5 dye, using (A) free dye and (B) CDN<sub>cy5.5</sub>. The corresponding fractions were also assayed for protein concentrations of (C) free dye and (D) CDN<sub>cy5.5</sub>. Free dye fractions were diffused and did not exhibit substantial fluorescence nor protein concentrations, whereas CDN<sub>cy5.5</sub> showed a peak in fluorescence values at fractions 3 and 4, together with corresponding peak protein values at the same fractions.

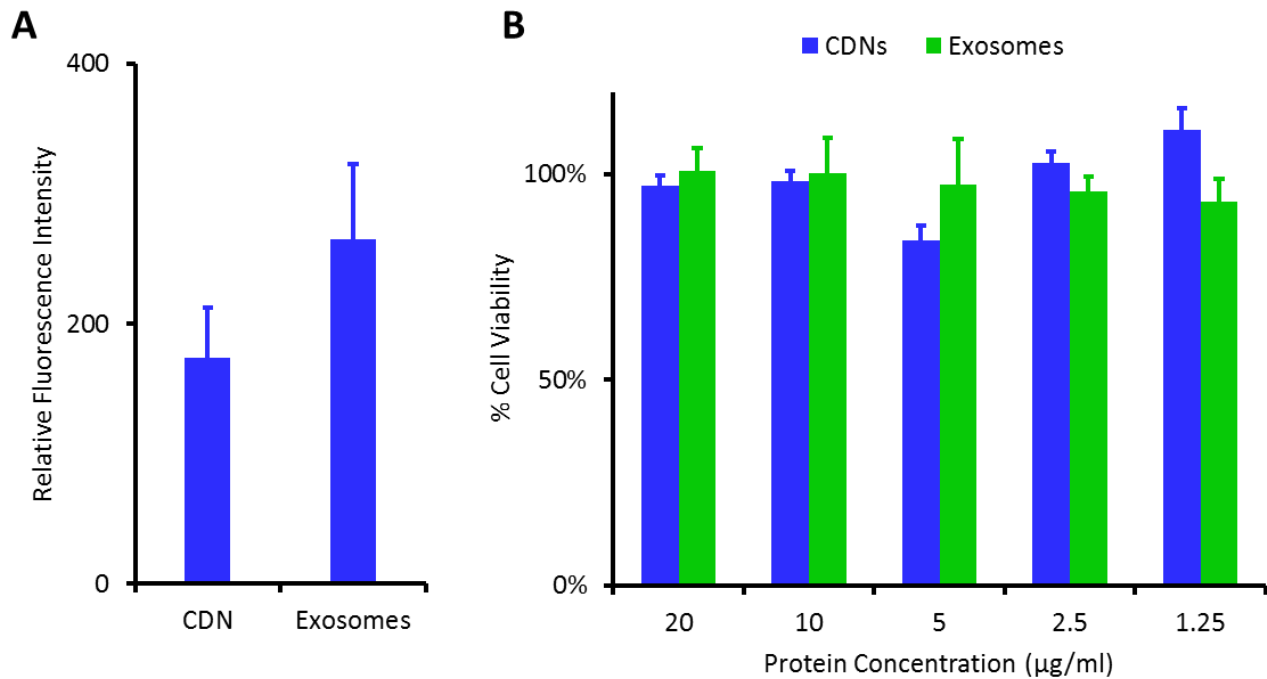

**Figure S3.** (A) Analysis of relative fluorescence intensity of CDNs and exosomes, with normalized protein concentrations, stained with Hoechst 33342 dye, as an indication of amount of DNA within the vesicles. Analysis was done by adsorbing CDNs and exosomes onto beads before staining with Hoechst 33342 and analysis *via* flow cytometry. (B) Effect of empty CDNs and exosomes on HeLa cell viability using standard MTT assay. HeLa cells were incubated with normalized protein concentrations of CDNs and exosomes for 48 hours.

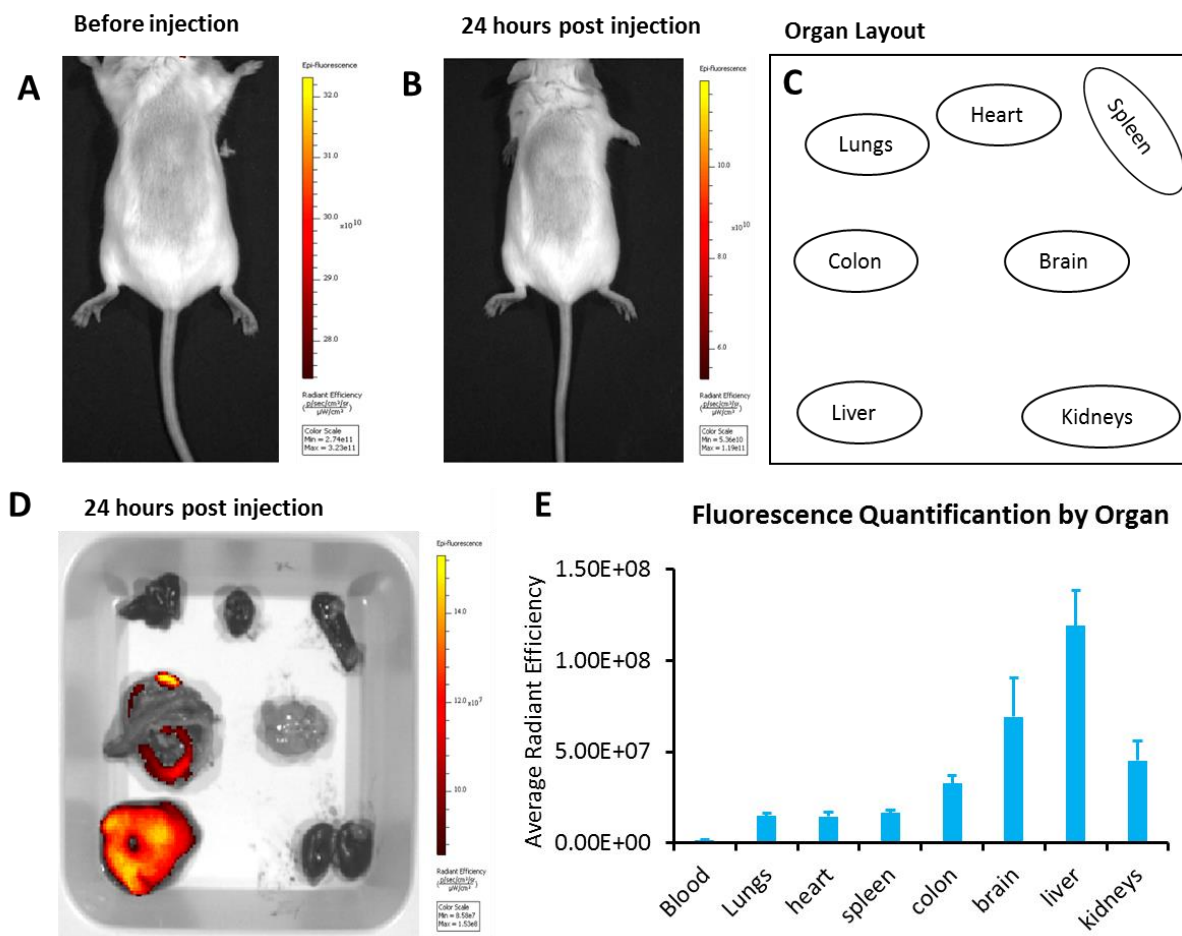

**Figure S4.** (A) IVIS image of representative mice without tumour before tail vein IV injection with Cy5.5 labelled CDNs. (B) IVIS image of mice without tumour post 24 hours after injection with Cy5.5 labelled CDNs. (C) Organ layout schematic. (D) IVIS imaging of excised organs 24 hours post injection. (E) Fluorescence quantification of excised organs 24 hours post injection.

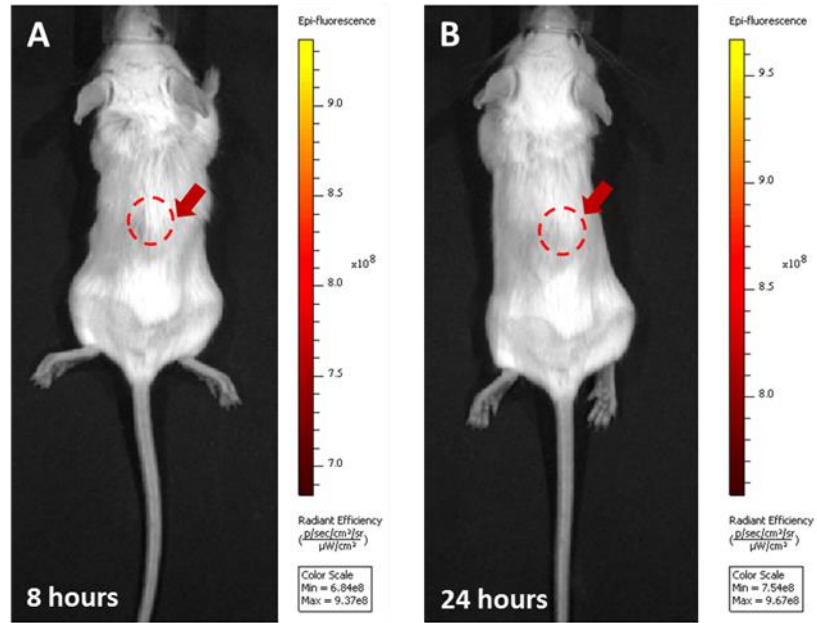

**Figure S5.** Mice tumour model after IV tail vein injection of PBS and imaged for cyanine 7 fluorescence at (A) 8 hours and (B) 24 hours. Tumour positions are marked by red arrows.
